# Supplementary material
Source: PubMed Central journal article supplement (PMC3099471)

# “Supplemental Material”

## Supplement I:

Cells were treated with CRP 25 ug/mL or Boiled CRP 25 ug/mL or with scrambled siRNA or TLR4 siRNA. Another set of cells was treated with LPS (1 ug/ml) in absence and presence of TLR4siRNA. M1/M2 phenotype was assessed by flow cytometry

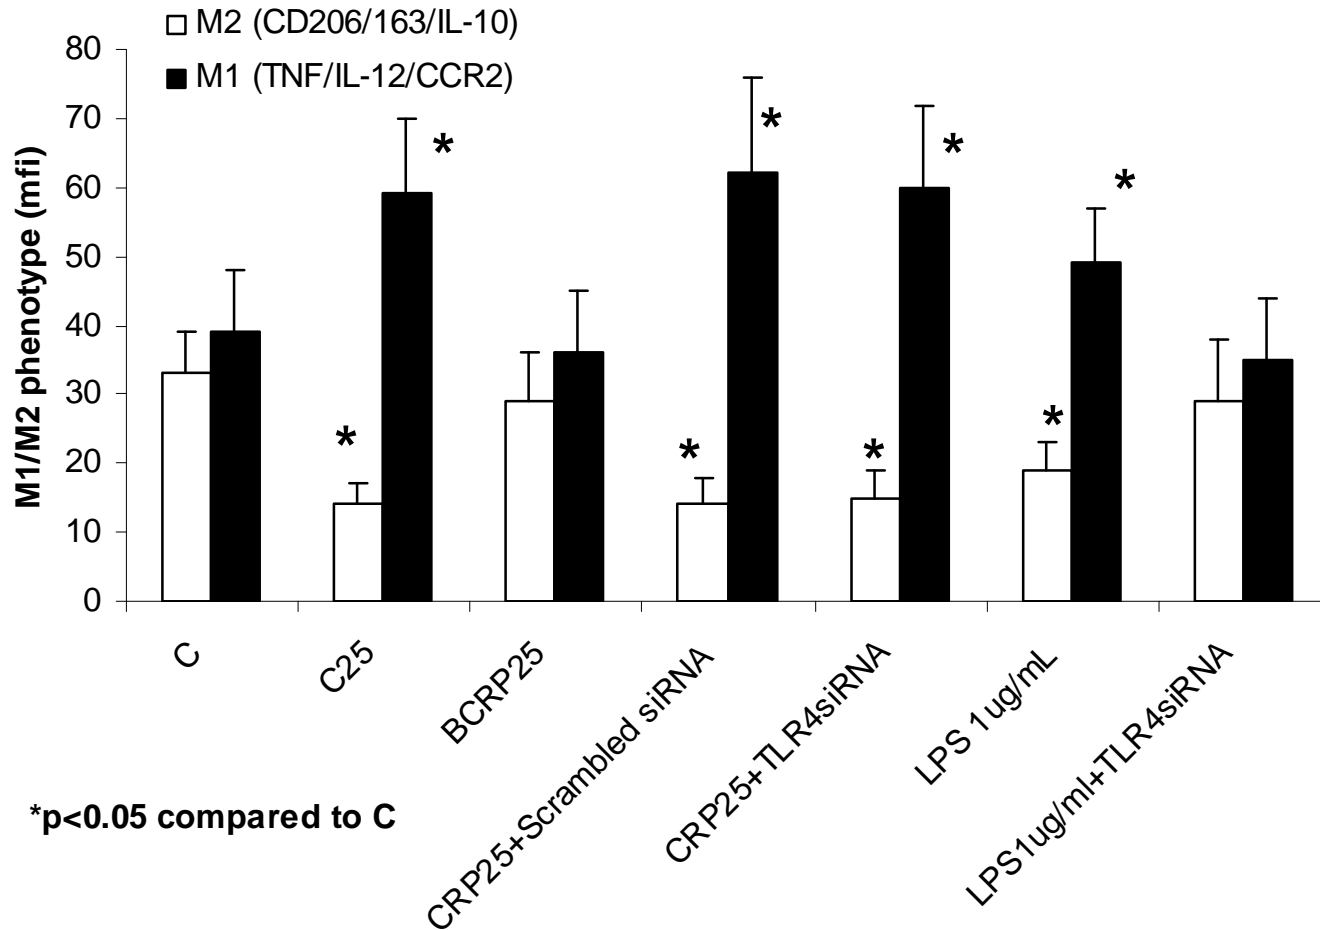

Supplement: NIHMS287660-supplement-1.pdf [file NIHMS287660-supplement-1.pdf]
